# Supplementary material
Source: publisher figshare collection journal article supplement (https://frontiersin.figshare.com/ndownloader/files/22472318)
Supplement: Supplementary file [file 22472318]

## Full-length protein

Match: read scoring matrix.

Match: assigning 531 x 531 pairwise scores.

MatchAlign: aligning residues (531 vs 531)...

MatchAlign: score 2596.000

ExecutiveAlign: 531 atoms aligned.

ExecutiveRMS: 16 atoms rejected during cycle 1 (RMSD=3.25).

ExecutiveRMS: 18 atoms rejected during cycle 2 (RMSD=0.95).

ExecutiveRMS: 35 atoms rejected during cycle 3 (RMSD=0.70).

ExecutiveRMS: 27 atoms rejected during cycle 4 (RMSD=0.56).

ExecutiveRMS: 25 atoms rejected during cycle 5 (RMSD=0.46).

Executive: RMSD = 0.383 (410 to 410 atoms)

Executive: object "aln\_533698\_to\_533699" created.

## Divergent region (2 a-helices)

Match: read scoring matrix.

Match: assigning 40 x 40 pairwise scores.

MatchAlign: aligning residues (40 vs 40)...

MatchAlign: score 94.000

ExecutiveAlign: 40 atoms aligned.

ExecutiveRMS: 3 atoms rejected during cycle 1 (RMSD=1.22).

ExecutiveRMS: 2 atoms rejected during cycle 2 (RMSD=0.95).

ExecutiveRMS: 2 atoms rejected during cycle 3 (RMSD=0.77).

ExecutiveRMS: 2 atoms rejected during cycle 4 (RMSD=0.67).

ExecutiveRMS: 1 atoms rejected during cycle 5 (RMSD=0.57).

Executive: RMSD = 0.536 (30 to 30 atoms)

## Full-length protein excluding the divergent region

Match: read scoring matrix.

Match: assigning 477 x 477 pairwise scores.

MatchAlign: aligning residues (477 vs 477)...

MatchAlign: score 2427.000

ExecutiveAlign: 477 atoms aligned.

ExecutiveRMS: 8 atoms rejected during cycle 1 (RMSD=1.15).

ExecutiveRMS: 30 atoms rejected during cycle 2 (RMSD=0.72).

ExecutiveRMS: 28 atoms rejected during cycle 3 (RMSD=0.58).

ExecutiveRMS: 23 atoms rejected during cycle 4 (RMSD=0.46).

ExecutiveRMS: 15 atoms rejected during cycle 5 (RMSD=0.38).

Executive: RMSD = 0.333 (373 to 373 atoms)

Executive: object "aln\_R1\_to\_R2" created.
